# Supplementary material for: Effect of clustered peptide binding on DNA condensation
Source: Royal Society of Chemistry journal article supplement (doi:10.1039/b908873c), 2009-09-25
Supplement: b908873c.pdf [file b908873c.pdf]

## Supporting Information

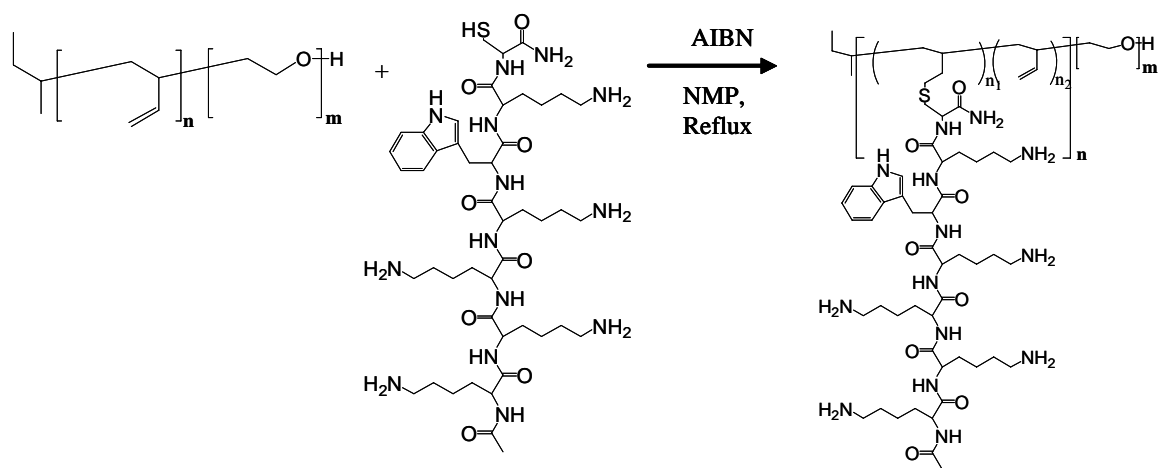

**S1.** Grafting of Cys-oligopeptides onto the PEG-*b*-PBD via free radical addition route.

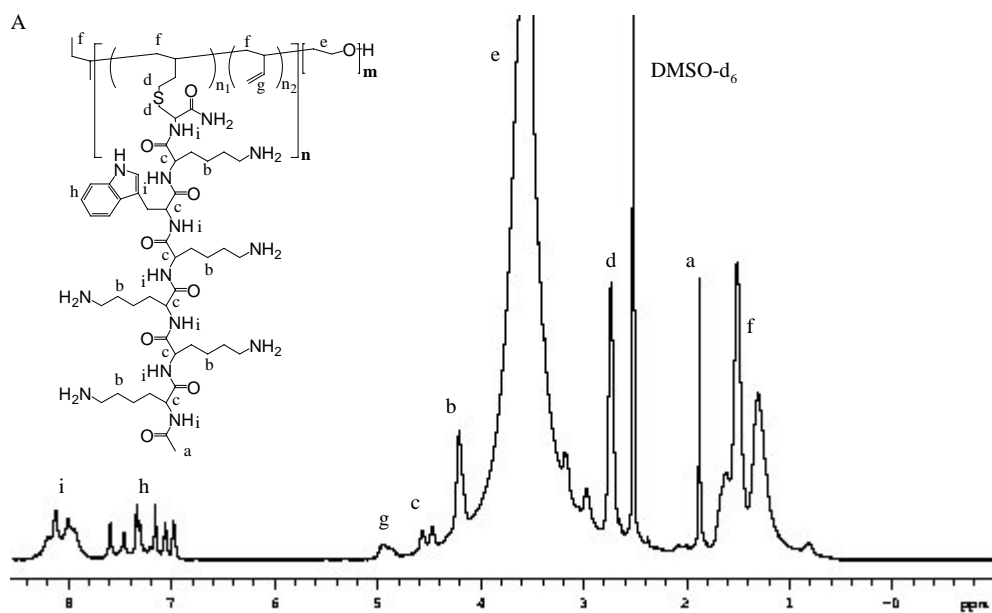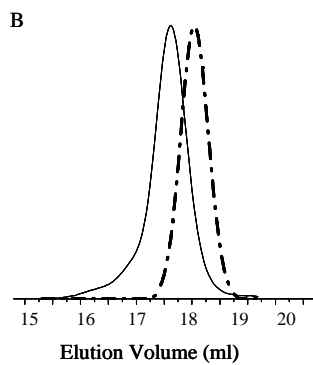

**S2.** Characterization of the polymer - peptide hybrid by <sup>1</sup>H NMR and GPC. (A) Representative <sup>1</sup>H NMR (solvent: DMSO-d<sub>2</sub>) of **PP**<sub>40</sub> and (B) GPC (eluent: NMP) of PEG-*b*-PBD precursor (solid line) and **PP**<sub>40</sub> (dashed line).

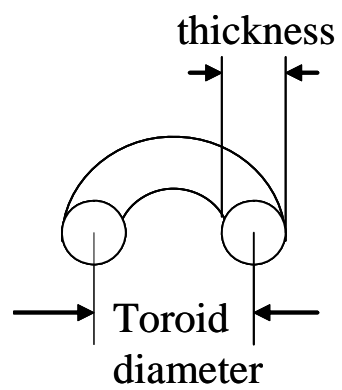

**S3.** Definition of the diameter and thickness of a toroid.
